# Supplementary material
Source: PubMed Central journal article supplement (PMC4393442)
Supplement: AEM.03803-14_zam999116231so1.pdf [file AEM.03803-14_zam999116231so1.pdf]

Table S1. Antimicrobial susceptibility of *S. aureus* and *E. coli* strains to erythromycin, determined using broth microdilution

| Strain                            | Antibiotic resistance gene <sup>a</sup>               | MIC of erythromycin (µg/ml) | Reference       |
|-----------------------------------|-------------------------------------------------------|-----------------------------|-----------------|
| <i>S. aureus</i> /vector          |                                                       |                             |                 |
| RN4220/pBUS1                      | <i>tet(L)</i>                                         | ≤0.5                        | (1)             |
| RN4220/pBUS1-P <sub>cap</sub>     | <i>tet(L)</i>                                         | ≤0.5                        | This study      |
| RN4220/pBUS1-P <sub>cap</sub> -HC | <i>tet(L)</i>                                         | ≤0.5                        | This study      |
| RN4220/pTSSC-P <sub>cap</sub>     | <i>tet(L)</i>                                         | ≤0.5                        | This study      |
| RN4220/pTSSCm-P <sub>cap</sub>    | <i>tet(L)</i>                                         | ≤0.5                        | This study      |
| RN4220/pJW13                      | <i>tet(L)</i> , <i>erm(44)</i>                        | >256                        | (2)             |
| RN4220/pJW13-HC                   | <i>tet(L)</i> , <i>erm(44)</i>                        | >256                        | This study      |
| RN4220/pTJW13                     | <i>tet(L)</i> , <i>erm(44)</i>                        | >256                        | This study      |
| RN4220/pJW13-RGS-His              | <i>tet(L)</i> ,<br><i>erm(44)-rgs-his<sub>6</sub></i> | >256                        | This study      |
| RN4220/pJW13-HC-RGS-His           | <i>tet(L)</i> ,<br><i>erm(44)-rgs-his<sub>6</sub></i> | >256                        | This study      |
| RN4220/pTJW13-RGS-His             | <i>tet(L)</i> ,<br><i>erm(44)-rgs-his<sub>6</sub></i> | >256                        | This study      |
| <i>E. coli</i> /vector            |                                                       |                             |                 |
| AG100A/pBUS1                      | <i>tet(L)</i>                                         | 4                           | (1); this study |
| AG100A/pBUS1-P <sub>cap</sub>     | <i>tet(L)</i>                                         | 4                           | This study      |
| AG100A/pBUS1-P <sub>cap</sub> -HC | <i>tet(L)</i>                                         | 4                           | This study      |
| AG100A/pJW13                      | <i>tet(L)</i> , <i>erm(44)</i>                        | 64                          | This study      |
| AG100A/pJW13-HC                   | <i>tet(L)</i> , <i>erm(44)</i>                        | 64                          | This study      |
| AG100A/pJW13-RGS-His              | <i>tet(L)</i> ,<br><i>erm(44)-rgs-his<sub>6</sub></i> | 64                          | This study      |
| AG100A/pJW13-HC-RGS-His           | <i>tet(L)</i> ,<br><i>erm(44)-rgs-his<sub>6</sub></i> | 64                          | This study      |
| AG100/pTSSC-P <sub>cap</sub>      | <i>tet(L)</i>                                         | 64                          | This study      |
| AG100/pTSSCm-P <sub>cap</sub>     | <i>tet(L)</i>                                         | 64                          | This study      |
| AG100/pTJW13                      | <i>tet(L)</i> , <i>erm(44)</i>                        | >256                        | This study      |
| AG100/pTJW13-RGS-His              | <i>tet(L)</i> ,<br><i>erm(44)-rgs-his<sub>6</sub></i> | >256                        | This study      |

<sup>a</sup> Antibiotic resistance genes: *erm(44)*, macrolide-lincosamide-streptogramin B rRNA methylase gene; *erm(44)-rgs-his<sub>6</sub>*, *erm(44)* with CSRGSHHHHHH codons fused to the 3' end of the gene; *tet(L)* tetracycline efflux gene.

## REFERENCES

1. **Rossi J, Bischoff M, Wada A, Berger-Bächi B.** 2003. MsrR, a putative cell envelope-associated element involved in *Staphylococcus aureus sarA* attenuation. Antimicrob. Agents Chemother. **47**:2558-2564.
2. **Wipf JRK, Schwendener S, Perreten V.** 2014. The novel macrolide-lincosamide-streptogramin B resistance gene *erm(44)* is associated with a prophage in *Staphylococcus xylosus*. Antimicrob. Agents Chemother. **58**:6133-6138.

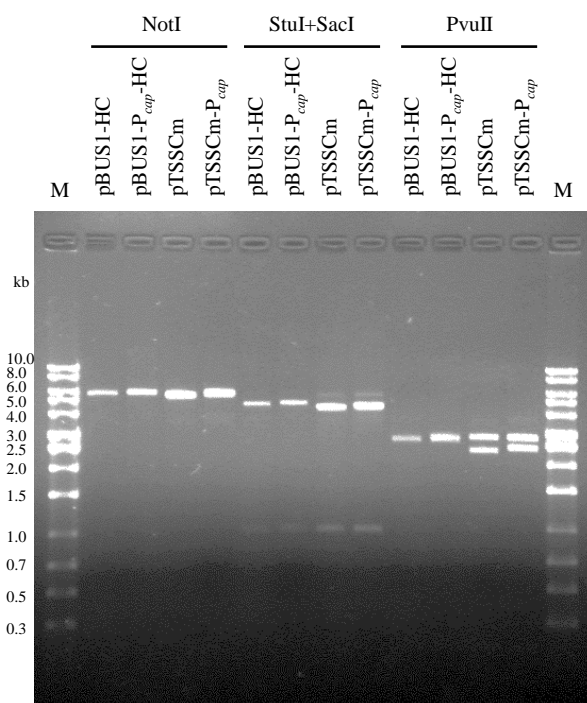

**FIG. S1.** Restriction digestion pattern of the shuttle vectors isolated from *S. aureus* RN4220. Fifty nanograms (pBUS1-HC, pBUS1-P<sub>cap</sub>-HC) or 100 ng (pTSSCm and pTSSCm-P<sub>cap</sub>) of the double-stranded DNA was used for restriction digest. The vectors were linearized using NotI. The presence of the 1-kb fragment containing *rrnB*(T1)<sub>5</sub> was confirmed after StuI and SacI digestion. The PvuII-cleavage products were 0.2 kb, 2.7 kb and 2.7 kb for pBUS1-HC; 0.2 kb, 2.7 kb and 2.8 kb for pBUS1-P<sub>cap</sub>-HC; 0.2 kb, 2.3 kb and 2.8 kb for pTSSCm; and 0.2, 2.4 and 2.8 kb for pTSSCm-P<sub>cap</sub>. M: 1 kb DNA ladder (Solis BioDyne).
